# Supplementary material
Source: PubMed Central journal article supplement (PMC8532126)
Supplement: NIHMS1748191-supplement-2.pdf [file NIHMS1748191-supplement-2.pdf]

## Supplementary Information for

### **Inhibition of mitochondrial respiration impairs nutrient consumption and metabolite transport in human retinal pigment epithelium**

Rui Zhang<sup>1,2,3&</sup>, Abbi L Engel<sup>4&</sup>, Yekai Wang<sup>1,2</sup>, Bo Li<sup>1,2</sup>, Weiyong Shen<sup>3</sup>, Mark C Gillies<sup>3</sup>, Jennifer Chao<sup>4\*</sup> and Jianhai Du<sup>1,2\*</sup>

<sup>1</sup>Department of Ophthalmology, West Virginia University, Morgantown, WV 26506

<sup>2</sup>Department of Biochemistry, West Virginia University, Morgantown, WV 26506

<sup>3</sup>Save Sight Institute, Sydney Medical School, University of Sydney, Sydney, NSW 2000, Australia

<sup>4</sup>Department of Ophthalmology, University of Washington, Seattle, WA 98109

&These authors contributed equally to this work.

\* Corresponding Authors: Jennifer R. Chao, 750 Republican Street, Box 358058, Seattle WA 98109; Phone: (206) 221-0594; Email: jrchoa@uw.edu; or Jianhai Du, One Medical Center Dr, PO Box 9193, West Virginia University Eye Institute, Morgantown, WV 26505; Phone: (304)-598-6903; Fax: (304)-598-6928; Email: jianhai.du@wvumedicine.org.

#### **This PDF file includes:**

**Supplemental Methods:** LDH Activity Assay

**Fig. S1.** The impact of mitochondrial inhibitors on LDH activity.

**Fig. S2.** The impact of the inhibition of mitochondrial respiration on glycolysis and TCA cycle intermediates.

**Fig. S3.** The impact of mitochondrial inhibition on the metabolism of amino acids.

**Fig. S4.** The impact of mitochondrial inhibition on the urea cycle.

**Fig. S5.** The impact of mitochondrial inhibition on the metabolism of nucleotides.

**Table S1.** Significantly changed metabolites in 1h media after inhibition of mitochondrial respiration.

**Table S2.** Significantly changed metabolites in 6h media after inhibition of mitochondrial respiration.

**Table S3.** Significantly changed metabolites in 24h media after inhibition of mitochondrial respiration.

**Table S4.** Significantly changed metabolites in cells at 24h after inhibition of mitochondrial respiration.

**Table S5.** The reagents and key resources.

**Table S6.** The list of metabolites and parameters for LC MS and GC MS

## Supplemental Methods

### LDH Activity Assay

The LDH activity assay was performed using lactate dehydrogenase-SL assay kit (Sekisui Diagnostic, # 327-30 ) according to the manual. Protein, which was extracted from the liver with 50mM K<sub>2</sub>PO<sub>4</sub> (pH=7.2) served as the positive control. Twenty  $\mu$ l of medium or positive control was mixed with 80 $\mu$ l fresh-made reaction buffer, which contains 260 mM N-methyl-D-glucamine, 40mM lactate, and 2mM NAD. The absorbance at the excitation of 340nm was measured every 30s at 37°C for 20 minutes by the FilterMax F5 Multi-Mode Microplate Reader (Molecular Devices, Sunnyvale, CA, USA). The LDH activity is calculated as delta change, as we previously reported (1, 2) and normalized over the DMSO group.

### References

1. Du, J.; Yanagida, A.; Knight, K.; Engel, A. L.; Vo, A. H.; Jankowski, C.; Sadilek, M.; Tran, V. T.; Manson, M. A.; Ramakrishnan, A.; Hurley, J. B.; Chao, J. R., Reductive carboxylation is a major metabolic pathway in the retinal pigment epithelium. *Proc Natl Acad Sci U S A* **2016**, 113, (51), 14710-14715.
2. Yam, M.; Engel, A. L.; Wang, Y.; Zhu, S.; Hauer, A.; Zhang, R.; Lohner, D.; Huang, J.; Dinterman, M.; Zhao, C.; Chao, J. R.; Du, J., Proline mediates metabolic communication between retinal pigment epithelial cells and the retina. *J Biol Chem* **2019**, 294, (26), 10278-10289.

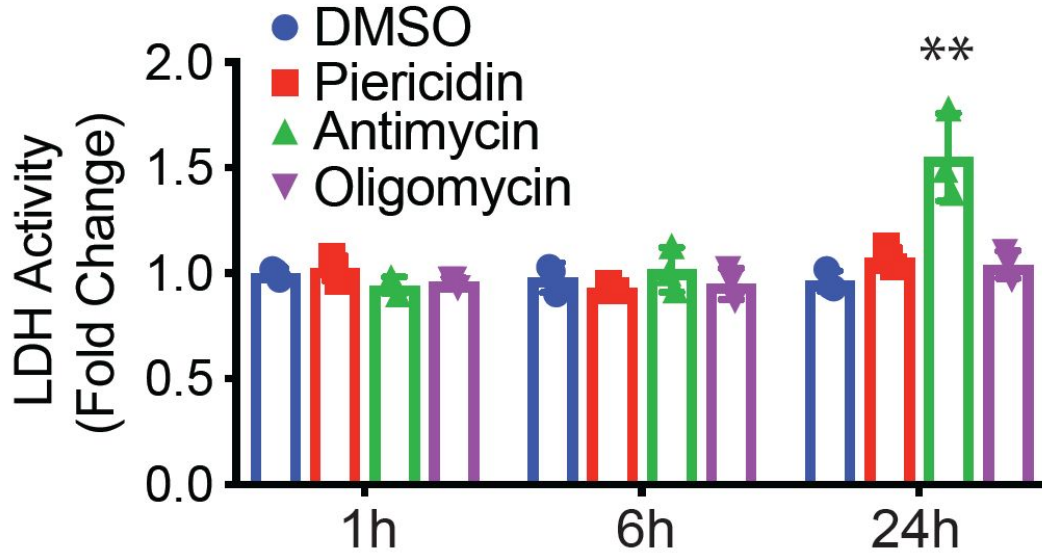

**Fig. S1. The impact of mitochondrial inhibitors on LDH activity.** The data were presented as fold changes of  $\Delta$  absorbance density at 340nm over the groups with DMSO at different time points. N=3. \*\*P<0.01 vs. the groups treated with DMSO.

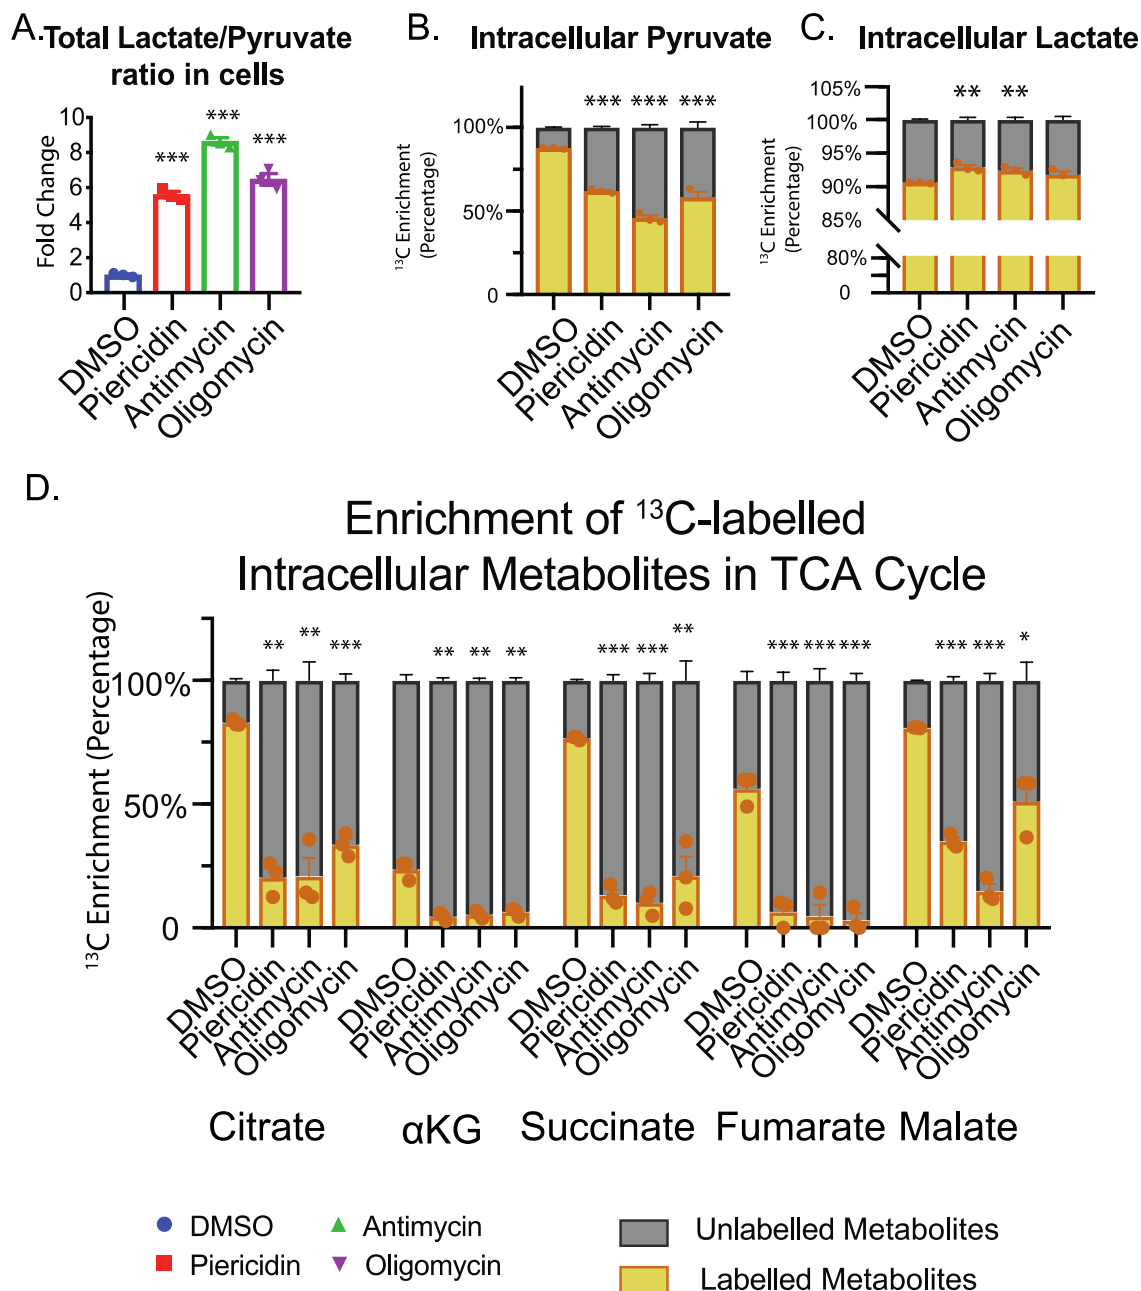

**Fig. S2. The impact of the inhibition of mitochondrial respiration on glycolysis and TCA cycle intermediates. (A)** Lactate/pyruvate ratio over the groups with DMSO. **(B-D)** Enrichment of <sup>13</sup>C-labelled intracellular metabolites in glycolysis and the TCA cycle. N=3. \*P<0.05, \*\*P<0.01, \*\*\*P<0.001 vs. the groups treated with DMSO.

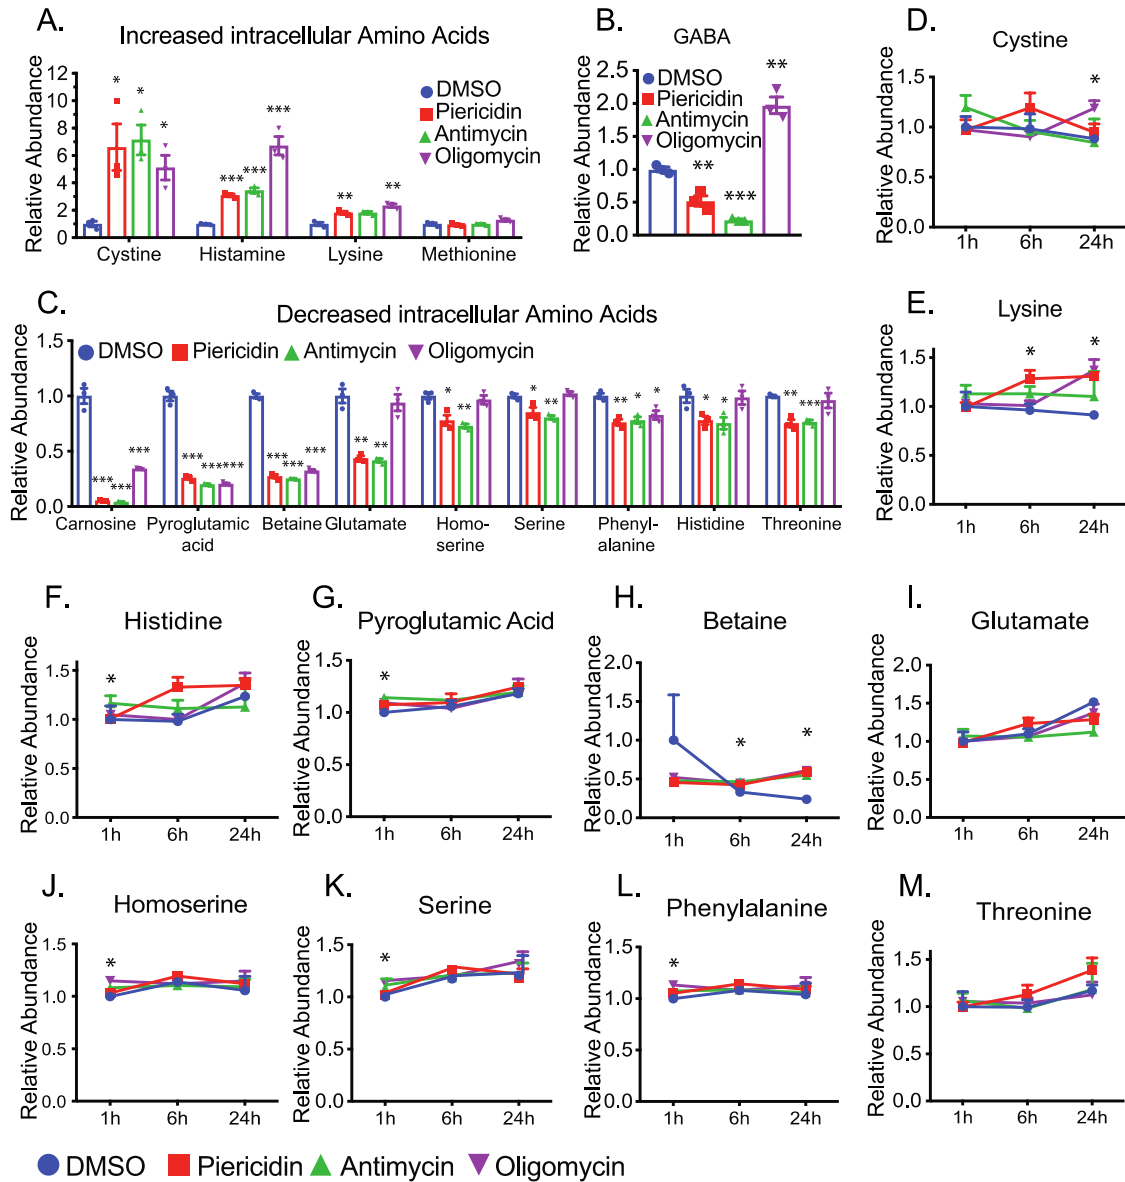

**Fig. S3. The impact of mitochondrial inhibition on the metabolism of amino acids.** (A-C) The relative abundance of intracellular amino acids. (D-M) The relative abundance of amino acids in media at different time points. N=3. \*P<0.05, \*\*P<0.01, \*\*\*P<0.001 vs. the groups treated with DMSO.

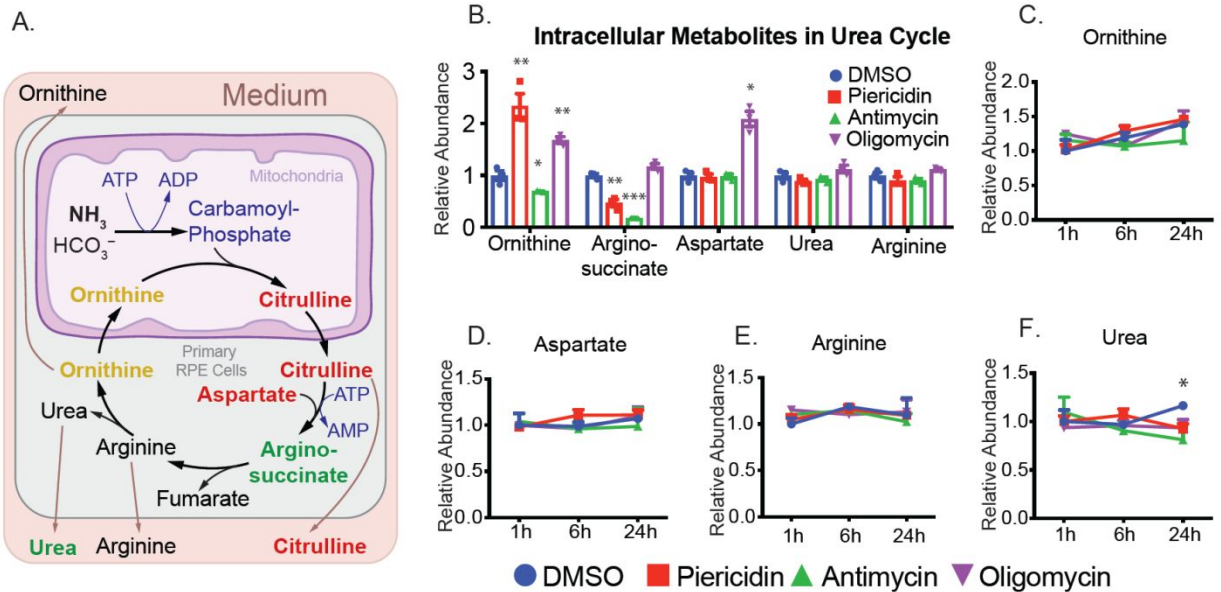

**Fig. S4. The impact of mitochondrial inhibition on the urea cycle.** (A) Schematic for the urea cycle. The color of metabolites represents the changes in relative abundance with mitochondrial inhibitors: red for the increased metabolites, green for decreased metabolites, orange for metabolites with mixed changes, and black for no change or not detected.) (B) Relative abundance of intracellular metabolites in the urea cycle. (C-F) The relative abundance of metabolites in the urea cycle in media at different time points. N=3. \* $P < 0.05$ , \*\* $P < 0.01$ , \*\*\* $P < 0.001$  vs the groups treated with DMSO.

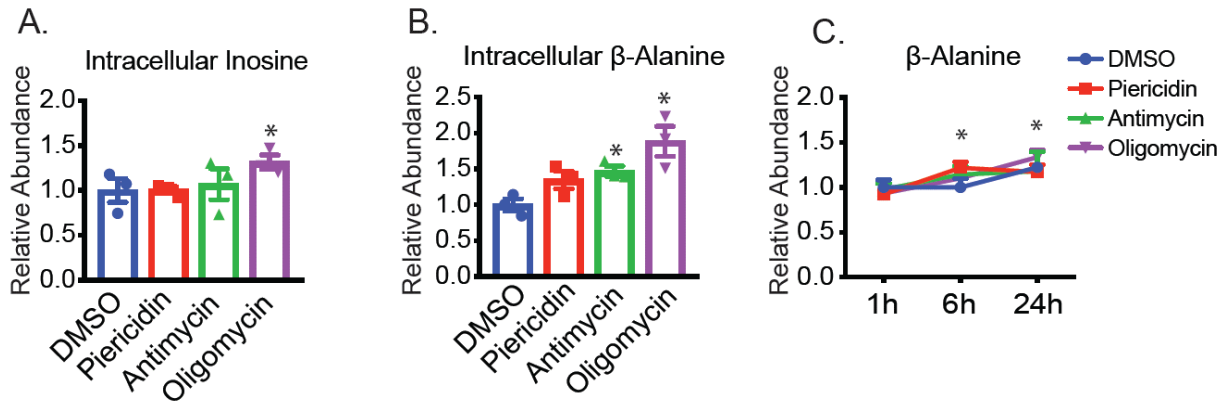

**Fig. S5. The impact of mitochondrial inhibition on the metabolism of nucleotides.** (A-B) The relative abundance of intracellular inosine and  $\beta$ -alanine. (C) The relative abundance of  $\beta$ -alanine in media at different time points. N=3. \* $P < 0.05$  vs. the groups treated with DMSO.

**Table S1.** Significantly changed metabolites in 1h media after inhibition of mitochondrial respiration.

| <b>Metabolite</b>       | <b>f value</b> | <b>p value</b> | <b>FDR</b> |
|-------------------------|----------------|----------------|------------|
| Lactate                 | 84.056         | 2.17E-06       | 0.000187   |
| Cis-aconitic acid       | 18.863         | 0.00055        | 0.018053   |
| Glycerol                | 15.177         | 0.001152       | 0.018053   |
| oxalic acid             | 14.905         | 0.001223       | 0.018053   |
| 3-Aminoisobutanoic acid | 14.088         | 0.001475       | 0.018053   |
| N1-Methylnicotinamide   | 13.916         | 0.001536       | 0.018053   |
| Glucose                 | 13.744         | 0.0016         | 0.018053   |
| Uracil                  | 13.543         | 0.001679       | 0.018053   |
| Succinate               | 10.919         | 0.003354       | 0.032047   |
| 4-hydroxyproline        | 10.388         | 0.003918       | 0.033697   |
| Proline                 | 9.3191         | 0.005466       | 0.042732   |

Data were analyzed with One Way-Anova using Fisher's FSD. False discovery rate (FDR).

**Table S2.** Significantly changed metabolites in 6h media after inhibition of mitochondrial respiration.

| <b>Metabolite</b>       | <b>f value</b> | <b>p value</b> | <b>FDR</b> |
|-------------------------|----------------|----------------|------------|
| Lactate                 | 1183.4         | 6.28E-11       | 5.53E-09   |
| Glucose                 | 957.35         | 1.46E-10       | 6.44E-09   |
| N-Aetyl-Glycine         | 658.48         | 6.50E-10       | 1.91E-08   |
| Proline                 | 143.75         | 2.69E-07       | 5.91E-06   |
| Succinate               | 118.25         | 5.77E-07       | 1.02E-05   |
| Choline                 | 76.951         | 3.06E-06       | 4.48E-05   |
| 3-Aminoisobutanoic acid | 56.382         | 1.00E-05       | 0.000126   |
| 3-Hydroxybutyric acid   | 53.695         | 1.21E-05       | 0.000127   |
| Isoleucine              | 52.669         | 1.30E-05       | 0.000127   |
| Leucine                 | 44.399         | 2.48E-05       | 0.000201   |
| N-Asp                   | 44.257         | 2.51E-05       | 0.000201   |
| N1-Methylnicotinamide   | 40.625         | 3.45E-05       | 0.000253   |
| a-Ketoglutarate         | 28.659         | 0.000125       | 0.000806   |
| Hypoxanthine            | 28.441         | 0.000128       | 0.000806   |
| Pyruvate                | 27.466         | 0.000146       | 0.000854   |
| Cis-aconitic acid       | 25.106         | 0.000201       | 0.001105   |
| Uracil                  | 21.365         | 0.000356       | 0.001844   |
| biotin                  | 20.956         | 0.000381       | 0.001863   |
| Cytidine                | 15.79          | 0.001008       | 0.00467    |
| Valine                  | 13.315         | 0.001776       | 0.007813   |
| Citrate                 | 12.257         | 0.002322       | 0.009563   |
| Isocitrate              | 12.147         | 0.002391       | 0.009563   |
| Erythritol              | 11.679         | 0.00271        | 0.01037    |
| Glycine                 | 11.105         | 0.00318        | 0.011659   |
| Betaine                 | 10.725         | 0.003547       | 0.012486   |
| Glutamine               | 10.39          | 0.003916       | 0.013253   |
| GAP                     | 9.5493         | 0.005076       | 0.016543   |
| hypotaurine             | 9.3035         | 0.005494       | 0.017265   |
| Inosine                 | 8.7804         | 0.006536       | 0.019833   |
| Methionine              | 8.6768         | 0.006771       | 0.019834   |
| Phenylpyruvate          | 8.5853         | 0.006987       | 0.019834   |
| Uridine                 | 7.534          | 0.010218       | 0.028099   |



**Table S3.** Significantly changed metabolites in 24h media after inhibition of mitochondrial respiration.

| Metabolite              | f value | p value  | FDR      |
|-------------------------|---------|----------|----------|
| N-Aetyl-Glycine         | 396.83  | 4.87E-09 | 4.34E-07 |
| Citrate                 | 194.91  | 8.12E-08 | 2.72E-06 |
| Isocitrate              | 189.02  | 9.17E-08 | 2.72E-06 |
| Guanine                 | 81.15   | 2.49E-06 | 3.75E-05 |
| Glucose                 | 80.943  | 2.51E-06 | 3.75E-05 |
| Proline                 | 80.841  | 2.53E-06 | 3.75E-05 |
| Butyrylcarnitine        | 51.732  | 1.39E-05 | 0.000177 |
| 3-Aminoisobutanoic acid | 47.674  | 1.90E-05 | 0.000206 |
| Phenylpyruvate          | 45.577  | 2.25E-05 | 0.000206 |
| Propionylcarnitine      | 44.972  | 2.36E-05 | 0.000206 |
| Choline                 | 44.091  | 2.54E-05 | 0.000206 |
| Hypoxanthine            | 42.447  | 2.93E-05 | 0.000217 |
| Erythritol              | 38.493  | 4.22E-05 | 0.000279 |
| 3-Hydroxybutyric acid   | 38.096  | 4.39E-05 | 0.000279 |
| hypotaurine             | 35.926  | 5.45E-05 | 0.000324 |
| Guanosine               | 35.298  | 5.82E-05 | 0.000324 |
| Nicotinamide            | 32.8    | 7.62E-05 | 0.000399 |
| Succinate               | 32.115  | 8.24E-05 | 0.000407 |
| Uracil                  | 30.207  | 0.000103 | 0.000483 |
| N1-Methylnicotinamide   | 26.107  | 0.000175 | 0.000777 |
| Citrulline              | 24.348  | 0.000224 | 0.00095  |
| Cytidine                | 22.645  | 0.00029  | 0.001126 |
| Isobutyrylcarnitine     | 22.627  | 0.000291 | 0.001126 |
| Betaine                 | 20.094  | 0.000441 | 0.001637 |
| Valine                  | 15.654  | 0.001038 | 0.003696 |
| Creatine                | 14.603  | 0.00131  | 0.004483 |
| Alanine                 | 13.944  | 0.001526 | 0.00503  |
| Cis-aconitic acid       | 13.213  | 0.001821 | 0.005788 |
| N-Asp                   | 12.666  | 0.002089 | 0.006411 |
| myo inositol            | 12.411  | 0.002231 | 0.006618 |
| Pyruvate                | 12.14   | 0.002395 | 0.006877 |
| Ethanolamine            | 10.564  | 0.003718 | 0.010341 |
| Leucine                 | 9.4832  | 0.005184 | 0.013981 |
| PEP                     | 9.2877  | 0.005522 | 0.014313 |
| Isoleucine              | 9.229   | 0.005629 | 0.014313 |
| Glutamine               | 8.9763  | 0.006119 | 0.014874 |
| IPP                     | 8.9447  | 0.006184 | 0.014874 |

*Metabolic signature of dysfunctional mitochondria*

|                    |        |          |          |
|--------------------|--------|----------|----------|
| Xanthine           | 7.5011 | 0.010346 | 0.024232 |
| Acetyl L Carnitine | 7.3605 | 0.010918 | 0.024916 |
| Urea               | 7.2707 | 0.011304 | 0.025152 |
| Lactate            | 6.8862 | 0.013164 | 0.028575 |
| a-Ketoglutarate    | 6.2399 | 0.017237 | 0.036525 |
| Inosine            | 5.6898 | 0.02201  | 0.045556 |

**Table S4.** Significantly changed metabolites in cells at 24h after inhibition of mitochondrial respiration.

| Metabolite               | f value | p value  | FDR      |
|--------------------------|---------|----------|----------|
| Phosphocreatine          | 7112.1  | 4.86E-14 | 6.12E-12 |
| 2-Methylbutyrylcarnitine | 2075.3  | 6.67E-12 | 3.11E-10 |
| AMP                      | 2021.9  | 7.40E-12 | 3.11E-10 |
| Isobutyrylcarnitine      | 720.15  | 4.55E-10 | 1.34E-08 |
| Oxidized glutathione     | 671.69  | 6.01E-10 | 1.34E-08 |
| Butyrylcarnitine         | 661.07  | 6.40E-10 | 1.34E-08 |
| Myristoylcarnitine       | 567.3   | 1.18E-09 | 2.12E-08 |
| Glucose                  | 543.96  | 1.39E-09 | 2.19E-08 |
| IMP                      | 501.9   | 1.92E-09 | 2.55E-08 |
| Aconitate                | 495.14  | 2.02E-09 | 2.55E-08 |
| NADH                     | 446.09  | 3.06E-09 | 3.51E-08 |
| Citraconic Acid          | 436.14  | 3.35E-09 | 3.52E-08 |
| Succinate                | 282.87  | 1.87E-08 | 1.81E-07 |
| 3-HB                     | 267.34  | 2.33E-08 | 2.10E-07 |
| IPP                      | 258.01  | 2.68E-08 | 2.25E-07 |
| 2-hydroxyglutarate       | 233.05  | 4.01E-08 | 3.16E-07 |
| Myo inositol             | 201.47  | 7.13E-08 | 5.28E-07 |
| 4-hydroxyproline         | 184.59  | 1.01E-07 | 7.04E-07 |
| $\alpha$ -Ketoglutarate  | 161.55  | 1.70E-07 | 1.13E-06 |
| Propionylcarnitine       | 153.46  | 2.08E-07 | 1.25E-06 |
| CAMP                     | 153.31  | 2.09E-07 | 1.25E-06 |
| Hypotaurine              | 151.49  | 2.19E-07 | 1.25E-06 |
| Citrulline               | 144.62  | 2.62E-07 | 1.38E-06 |
| N-Aetyl-Glycine          | 144.57  | 2.63E-07 | 1.38E-06 |
| NADPH                    | 115.9   | 6.24E-07 | 3.01E-06 |
| Isocitrate               | 115.06  | 6.42E-07 | 3.01E-06 |
| NADP                     | 114.97  | 6.44E-07 | 3.01E-06 |
| Betaine                  | 110.98  | 7.39E-07 | 3.22E-06 |
| Citrate                  | 110.85  | 7.42E-07 | 3.22E-06 |
| NAD                      | 109.62  | 7.75E-07 | 3.26E-06 |
| Cytosine                 | 92.405  | 1.51E-06 | 6.12E-06 |
| 1-Methyladenosine        | 89.12   | 1.73E-06 | 6.82E-06 |
| Adenine                  | 86.282  | 1.96E-06 | 7.50E-06 |
| Uracil                   | 81.54   | 2.44E-06 | 9.06E-06 |
| Argininosuccinate        | 74.84   | 3.40E-06 | 1.19E-05 |
| Hypoxanthine             | 74.826  | 3.40E-06 | 1.19E-05 |
| Carnosine                | 73.718  | 3.60E-06 | 1.21E-05 |
| Lysine                   | 73.558  | 3.63E-06 | 1.21E-05 |

|                         |        |          |          |
|-------------------------|--------|----------|----------|
| PEP                     | 68.663 | 4.73E-06 | 1.53E-05 |
| Choline                 | 60.793 | 7.54E-06 | 2.38E-05 |
| UDP                     | 55.99  | 1.03E-05 | 3.17E-05 |
| Glucose 1-phosphate     | 54.489 | 1.14E-05 | 3.43E-05 |
| Aminoadipic acid        | 53.834 | 1.20E-05 | 3.46E-05 |
| Cytidine                | 53.728 | 1.21E-05 | 3.46E-05 |
| 3PG                     | 53.143 | 1.26E-05 | 3.52E-05 |
| Taurine                 | 51.152 | 1.45E-05 | 3.98E-05 |
| 3-Aminoisobutanoic acid | 50.463 | 1.53E-05 | 4.10E-05 |
| Proline                 | 50.08  | 1.57E-05 | 4.11E-05 |
| Ornithine               | 49.898 | 1.60E-05 | 4.11E-05 |
| N-Asp                   | 48.631 | 1.76E-05 | 4.35E-05 |
| Gamma-Aminobutyric acid | 48.615 | 1.76E-05 | 4.35E-05 |
| Guanine                 | 47.679 | 1.90E-05 | 4.51E-05 |
| Hexanoylcarnitine       | 47.666 | 1.90E-05 | 4.51E-05 |
| Leucine                 | 47.091 | 1.99E-05 | 4.57E-05 |
| ADP                     | 47.05  | 1.99E-05 | 4.57E-05 |
| Isoleucine              | 44.614 | 2.43E-05 | 5.48E-05 |
| Guanosine               | 43.517 | 2.67E-05 | 5.91E-05 |
| Histamine               | 42.402 | 2.94E-05 | 6.40E-05 |
| Malate                  | 41.407 | 3.22E-05 | 6.87E-05 |
| Pyroglutamic acid       | 39.511 | 3.83E-05 | 8.05E-05 |
| Glycerol                | 39.216 | 3.94E-05 | 8.14E-05 |
| Thiamine                | 38.175 | 4.35E-05 | 8.85E-05 |
| Pantothenic acid        | 37.817 | 4.51E-05 | 8.94E-05 |
| Glucose 6-phosphate     | 37.75  | 4.54E-05 | 8.94E-05 |
| Lactate                 | 36.004 | 5.41E-05 | 0.000105 |
| Valine                  | 33.06  | 7.41E-05 | 0.000141 |
| ATP                     | 30.693 | 9.72E-05 | 0.000183 |
| Glycerate               | 29.992 | 0.000106 | 0.000196 |
| Aspartate               | 28.177 | 0.000133 | 0.000242 |
| GAP                     | 27.301 | 0.000149 | 0.000268 |
| Acetylglycine           | 25.91  | 0.00018  | 0.000319 |
| Xanthine                | 24.614 | 0.000216 | 0.000377 |
| Glutamine               | 23.262 | 0.000264 | 0.000452 |
| Acetyl L Carnitine      | 23.216 | 0.000266 | 0.000452 |
| biotin                  | 22.588 | 0.000293 | 0.000492 |
| Glutaric Acid           | 21.46  | 0.000351 | 0.000581 |
| Erythritol              | 20.339 | 0.000423 | 0.000692 |
| Glycine                 | 20.238 | 0.000431 | 0.000695 |

|                         |        |          |          |
|-------------------------|--------|----------|----------|
| Methionine              | 19.516 | 0.000489 | 0.000779 |
| L-Arginine              | 18.662 | 0.00057  | 0.000899 |
| Trigonelline            | 17.496 | 0.000712 | 0.001108 |
| Tryptophan              | 16.487 | 0.000872 | 0.001339 |
| Nicotinamide            | 16.214 | 0.000922 | 0.001386 |
| Urea                    | 16.205 | 0.000924 | 0.001386 |
| N1-Methylnicotinamide   | 14.959 | 0.001209 | 0.001792 |
| Palmitate               | 14.851 | 0.001238 | 0.001815 |
| Acetoacetate            | 14.43  | 0.001363 | 0.001973 |
| Phenylalanine           | 14.363 | 0.001384 | 0.001981 |
| Stearic acid            | 13.634 | 0.001643 | 0.002326 |
| Creatine                | 13.554 | 0.001675 | 0.002345 |
| Xanthurenic acid        | 13.446 | 0.00172  | 0.002381 |
| Histidine               | 13.343 | 0.001764 | 0.002415 |
| Cystathionine           | 13.198 | 0.001827 | 0.002461 |
| Erythrono 1,4 Lactone   | 13.179 | 0.001836 | 0.002461 |
| Maleic Acid             | 12.136 | 0.002398 | 0.00318  |
| Asparagene              | 11.676 | 0.002713 | 0.00356  |
| Serine                  | 11.552 | 0.002806 | 0.003645 |
| Hippurate               | 11.456 | 0.002882 | 0.003706 |
| Adipic Acid             | 11.38  | 0.002943 | 0.003746 |
| Fumarate                | 11.056 | 0.003225 | 0.004063 |
| Cis-aconitic acid       | 10.878 | 0.003394 | 0.004234 |
| Creatinine              | 10.382 | 0.003925 | 0.004849 |
| Oxalic acid             | 10.345 | 0.003969 | 0.004856 |
| L-Asparagine            | 10.013 | 0.00439  | 0.005319 |
| D-Ribulose 5-phosphate  | 9.9053 | 0.004538 | 0.005446 |
| N-alpha-Acetyl-L-lysine | 9.628  | 0.00495  | 0.005884 |
| Threonine               | 9.2331 | 0.005621 | 0.006619 |
| Succinic semiadehyde    | 8.9561 | 0.00616  | 0.007187 |
| L-Homoserine            | 8.8324 | 0.006422 | 0.007423 |
| Riboflavin              | 8.3701 | 0.007531 | 0.008626 |
| Glutathione             | 7.8015 | 0.009244 | 0.010493 |
| Tyrosine                | 7.2492 | 0.0114   | 0.012824 |
| Urate                   | 6.9685 | 0.012735 | 0.014201 |
| Alanine                 | 6.8475 | 0.013371 | 0.014779 |
| Beta-Alanine            | 6.5583 | 0.015059 | 0.0165   |
| Glutamate               | 6.5207 | 0.015298 | 0.016617 |
| Cystine                 | 4.4229 | 0.04115  | 0.044315 |
| carbonate               | 4.3858 | 0.041974 | 0.044819 |

**Table S5.** The reagents and key resources.

| <b>Reagent or Media components</b>                                 | <b>SOURCE</b>                        | <b>IDENTIFIER</b> |
|--------------------------------------------------------------------|--------------------------------------|-------------------|
| Piericidin                                                         | Cayman Chemical                      | 15379             |
| Antimycin A                                                        | Sigma-Aldrich                        | A8674             |
| Oligomycin                                                         | Sigma-Aldrich                        | 75351             |
| FCCP                                                               | Cayman Chemical                      | 15218             |
| rotenone                                                           | Sigma Aldrich                        | R8875             |
| DMSO                                                               | Sigma-Aldrich                        | D2650             |
| [ <sup>13</sup> C <sub>6</sub> ]-Glucose                           | Cambridge-Isotope Laboratories       | CLM-1396          |
| MEM a                                                              | Gibco Life Technologies (Invitrogen) | 12561056          |
| Non-essential amino acids                                          | Life Technologies (Invitrogen)       | 1140-050          |
| N1 medium supplement                                               | Sigma-Aldrich                        | N6530-5mL         |
| FBS                                                                | Atlanta Biologicals(R&D Systems)     | S11550            |
| Taurine                                                            | Sigma-Aldrich                        | T0625-10G         |
| Hydrocortisone                                                     | Sigma-Aldrich                        | H0396-100MG       |
| 3, 3', 5-Triiodo-L-Thyronine                                       | Sigma-Aldrich                        | T6397-100MG       |
| Penicillin-Streptomycin (5,000 U/mL)                               | Life Technologies (Invitrogen)       | 15070-063         |
| DMEM, no glucose, no glutamine, no phenol red                      | ThermoFisher                         | A1443001          |
| Y-27632 dihydrochloride                                            | Tocris/R&D Systems                   | 1254              |
| XF Calibrant Buffer (100mL)                                        | Agilent-Seahorse                     | 103059-000        |
| XF 24 well culture plate                                           | Agilent- Seahorse                    | 100777-004        |
| XFe24 Extracellular Flux Assay Kit (Sensor cartridge)              | Agilent-Seahorse                     | 102340-100        |
| XF Base Media (100mL)                                              | Agilent- Seahorse                    | 103193-100        |
| Sodium pyruvate (100mL)                                            | Gibco                                | 11360-070         |
| L-glutamine (100mL)                                                | Gibco                                | 25030-081         |
| <b>Cytotoxicity experiments</b>                                    |                                      |                   |
| Lactate Dehydrogenase-SL (kit)                                     | Sekisui Diagnostics                  | 327-30            |
| <b>Mass Spectrometry (LC MS and GC MS)</b>                         |                                      |                   |
| Methanol, Optima™ LC/MS Grade                                      | Fisher Chemical                      | A456-500          |
| Acquity UPLC BEH Amide 1.7 μm Vanguard pre-column 2.1 x 5mm column | Waters                               | 186004799         |
| Acquity UPLC BEH Amide 1.7 μm 2.1 x 50mm column                    | Waters                               | 186004800         |
| Water, Optima™ LC/MS Grade                                         | Fisher Chemical                      | 7732-18-5         |
| Acetonitrile, Optima™ LC/MS Grade                                  | Fisher Chemical                      | 75-05-8           |
| Ammonium Acetate                                                   | Sigma-Aldrich                        | 431311            |

|                                                      |                      |              |
|------------------------------------------------------|----------------------|--------------|
| Ammonium hydroxide 28 - 30% in water ACS             | VWR                  | AC42330-5000 |
| Methoxyamine hydrochloride                           | Sigma-Aldrich        | 226904       |
| Pyridine                                             | Sigma-Aldrich        | 270970       |
| N-tert-Butyldimethylsilyl-N-methyltrifluoroacetamide | Sigma-Aldrich        | 394882       |
| DB-5ms GC Column, 30 m, 0.25 mm, 0.25 $\mu$ m,       | Agilent Technologies | 122-5532     |

**Table S6.** The list of metabolites and parameters for LC MS and GC MS

| Names                     | Nutrients          | Precursor (Da) | Product (Da) | Declustering potential | Collision Energy | HMDB        | Platform | Polarity |
|---------------------------|--------------------|----------------|--------------|------------------------|------------------|-------------|----------|----------|
| Acetylglycine             | Amino acid         | 116.0          | 74.0         | -37.0                  | -14.0            | HMDB00532   | LCMS     | -        |
| Aconitate                 | Glucose            | 173.0          | 85.0         | -37.0                  | -18.0            | HMDB00072   | LCMS     | -        |
| Adenine                   | Nucleotide         | 134.0          | 107.1        | -92.0                  | -25.0            | HMDB00034   | LCMS     | -        |
| Adenosine 5'-diphosphate  | Energy             | 426.0          | 79.1         | -65.0                  | -84.0            | HMDB01341   | LCMS     | -        |
| Aminoadipic acid          | Amino acid         | 160.1          | 116.1        | -47.0                  | -20.0            | HMDB00510   | LCMS     | -        |
| Adenosine monophosphate   | Energy             | 346.0          | 134.0        | -82.0                  | -40.0            | HMDB00045   | LCMS     | -        |
| Cyclic AMP                | Nucleotide         | 328.0          | 134.0        | -87.0                  | -32.0            | HMDB00058   | LCMS     | -        |
| Citraconic Acid           | Glucose            | 129.0          | 85.0         | -21.0                  | -12.0            | HMDB00634   | LCMS     | -        |
| Citrulline                | Amino acid         | 174.1          | 131.1        | -32.0                  | -20.0            | HMDB00904   | LCMS     | -        |
| Creatinine                | Amino acid         | 112.0          | 41.0         | -67.0                  | -36.0            | HMDB00562   | LCMS     | -        |
| D-Ribulose 5-phosphate    | Nucleotide         | 229.0          | 79.0         | -70.0                  | -45.0            | HMDB0000618 | LCMS     | -        |
| Glucose                   | Glucose            | 179.0          | 89.0         | -50.0                  | -15.0            | HMDB00122   | LCMS     | -        |
| Glucose 1-phosphate       | Glucose            | 259.0          | 79.0         | -85.0                  | -60.0            | HMDB0001586 | LCMS     | -        |
| Glucose 6-phosphate       | Glucose            | 259.0          | 79.0         | -46.0                  | -62.0            | HMDB01401   | LCMS     | -        |
| Glutaric Acid             | Amino acid         | 131.0          | 87.0         | -45.0                  | -16.0            | HMDB00661   | LCMS     | -        |
| Glutathione               | Energy             | 306.0          | 143.1        | -61.0                  | -26.0            | HMDB00125   | LCMS     | -        |
| Guanosine                 | Nucleotide         | 282.1          | 150.0        | -67.0                  | -33.0            | HMDB00133   | LCMS     | -        |
| Hippurate                 | Amino acid         | 178.0          | 77.1         | -61.0                  | -23.0            | HMDB00714   | LCMS     | -        |
| Hypotaurine               | Amino acid         | 108.1          | 64.0         | -40.0                  | -17.0            | HMDB0000965 | LCMS     | -        |
| Hypoxanthine              | Nucleotide         | 135.0          | 65.0         | -108.0                 | -37.0            | HMDB00157   | LCMS     | -        |
| Inosinic acid             | Nucleotide         | 347.0          | 79.0         | -118.0                 | -86.0            | HMDB00175   | LCMS     | -        |
| Inosine                   | Nucleotide         | 267.0          | 135.0        | -123.0                 | -30.0            | HMDB0000195 | LCMS     | -        |
| Myo inositol              | Amino acid         | 179.0          | 87.0         | -105.0                 | -24.0            | HMDB0000211 | LCMS     | -        |
| NADH                      | NAD metabolism     | 664.0          | 397.0        | -7.0                   | -46.0            | HMDB01487   | LCMS     | -        |
| Oxalic acid               | Nucleotide         | 89.0           | 61.0         | -45.0                  | -10.0            | HMDB0002329 | LCMS     | -        |
| Pantothenic acid          | Vitamin            | 218.1          | 71.0         | -70.0                  | -41.0            | HMDB0000210 | LCMS     | -        |
| Phosphocreatine           | Amino acid         | 210.0          | 79.0         | -42.0                  | -49.0            | HMDB0041624 | LCMS     | -        |
| Uridine 5'-diphosphate    | Nucleotide         | 403.0          | 79.0         | -30.0                  | -73.0            | HMDB00295   | LCMS     | -        |
| Urate                     | Nucleotide         | 167.0          | 124.0        | -86.0                  | -19.0            | HMDB0000289 | LCMS     | -        |
| Xanthine                  | Nucleotide         | 151.0          | 108.0        | -70.0                  | -23.0            | HMDB00292   | LCMS     | -        |
| Xanthurenic acid          | Nucleotide         | 204.0          | 160.0        | -67.0                  | -19.0            | HMDB00881   | LCMS     | -        |
| Adipic Acid               | Dicarboxylic acids | 145.0          | 83.0         | -50.0                  | -17.0            | HMDB0000448 | LCMS     | -        |
| Isopentenyl pyrophosphate | Lipid              | 245.1          | 79.0         | -60.0                  | -50.0            | HMDB0001347 | LCMS     | -        |
| 1-Methyladenosine         | Nucleotide         | 282.1          | 150.1        | 48.0                   | 35.0             | HMDB03331   | LCMS     | +        |
| 3-Aminoisobutanoic acid   | Nucleotide         | 104.1          | 58.0         | 55.0                   | 38.0             | HMDB03911   | LCMS     | +        |
| Acetyl L Carnitine        | Carnitine          | 204.1          | 85.0         | 71.0                   | 30.0             | HMDB00201   | LCMS     | +        |



*Metabolic signature of dysfunctional mitochondria*

|                             |                |       |       |       |      |             |      |   |
|-----------------------------|----------------|-------|-------|-------|------|-------------|------|---|
| Adenosine                   | Nucleotide     | 268.1 | 136.0 | 95.0  | 38.0 | HMDB00050   | LCMS | + |
| Alanine                     | Amino acid     | 90.0  | 44.0  | 50.0  | 20.0 | HMDB0000161 | LCMS | + |
| ATP                         | Energy         | 507.9 | 136.1 | 14.0  | 60.0 | HMDB00538   | LCMS | + |
| Betaine                     | Amino acid     | 118.1 | 58.0  | 166.0 | 56.0 | HMDB00043   | LCMS | + |
| Carnosine                   | Amino acid     | 227.1 | 110.1 | 157.0 | 32.0 | HMDB00033   | LCMS | + |
| Choline                     | Amino acid     | 104.1 | 60.1  | 95.0  | 37.0 | HMDB00097   | LCMS | + |
| Creatine                    | Amino acid     | 132.1 | 90.0  | 170.0 | 17.0 | HMDB00064   | LCMS | + |
| Cytidine                    | Nucleotide     | 244.0 | 112.1 | 50.0  | 30.0 | HMDB00089   | LCMS | + |
| Cytosine                    | Nucleotide     | 112.0 | 95.0  | 97.0  | 23.0 | HMDB0000630 | LCMS | + |
| Flavin adenine diNucleotide | Energy         | 786.1 | 136.1 | 52.0  | 43.0 | HMDB01248   | LCMS | + |
| Glutamine                   | Amino acid     | 147.1 | 84.1  | 45.0  | 23.0 | HMDB00641   | LCMS | + |
| L-Arginine                  | Amino acid     | 175.1 | 70.1  | 45.0  | 33.0 | HMDB00517   | LCMS | + |
| L-Asparagine                | Amino acid     | 133.1 | 70.1  | 55.0  | 24.0 | HMDB0033780 | LCMS | + |
| L-Homoserine                | Amino acid     | 120.1 | 74.0  | 37.0  | 16.0 | HMDB00719   | LCMS | + |
| Lysine                      | Amino acid     | 147.1 | 84.0  | 38.0  | 22.0 | HMDB0000182 | LCMS | + |
| 1-Methylnicotinamide        | Nucleotide     | 137.0 | 78.0  | 110.0 | 37.0 | HMDB00699   | LCMS | + |
| NAD                         | NAD metabolism | 664.0 | 136.0 | 27.0  | 48.0 | HMDB00902   | LCMS | + |
| NADP                        | NAD metabolism | 744.0 | 136.0 | 9.0   | 78.0 | HMDB00217   | LCMS | + |
| NADPH                       | NAD metabolism | 746.0 | 302.0 | 20.0  | 44.0 | HMDB00221   | LCMS | + |
| Nicotinamide                | NAD metabolism | 123.0 | 80.0  | 111.0 | 20.0 | HMDB01406   | LCMS | + |
| Ornithine                   | Amino acid     | 133.0 | 70.0  | 47.0  | 23.0 | HMDB0000214 | LCMS | + |
| Oxidized glutathione        | Energy         | 613.0 | 231.0 | 16.0  | 42.0 | HMDB03337   | LCMS | + |
| Proline                     | Amino acid     | 116.1 | 70.1  | 70.0  | 44.0 | HMDB00162   | LCMS | + |
| Pyroglutamic acid           | Amino acid     | 130.1 | 84.0  | 100.0 | 20.0 | HMDB0000267 | LCMS | + |
| Riboflavin                  | Nucleotide     | 377.1 | 243.1 | 14.0  | 29.0 | HMDB00244   | LCMS | + |
| Serine                      | Amino acid     | 106.0 | 60.0  | 40.0  | 22.0 | HMDB0000187 | LCMS | + |
| Thiamine                    | Vitamin        | 265.0 | 122.1 | 67.0  | 40.0 | HMDB00235   | LCMS | + |
| Threonine                   | Amino acid     | 120.1 | 102.0 | 50.0  | 10.0 | HMDB0000167 | LCMS | + |
| Trigonelline                | NAD metabolism | 138.0 | 92.0  | 60.0  | 27.0 | HMDB00875   | LCMS | + |
| Tryptophan                  | Amino acid     | 205.0 | 146.0 | 75.0  | 35.0 | HMDB00929   | LCMS | + |
| Tyrosine                    | Amino acid     | 182.1 | 136.0 | 40.0  | 17.0 | HMDB0000158 | LCMS | + |
| Valine                      | Amino acid     | 118.1 | 72.0  | 60.0  | 14.0 | HMDB0000883 | LCMS | + |
| 2-MethylbutyroylCarnitine   | Carnitine      | 246.2 | 85.1  | 100.0 | 43.0 | HMDB0000378 | LCMS | + |
| ButyrylCarnitine            | Carnitine      | 232.2 | 85.1  | 72.0  | 30.0 | HMDB0002013 |      | + |
| Gamma-Aminobutyric acid     | Lipid          | 104.1 | 87.0  | 57.0  | 13.0 | HMDB0000112 | LCMS | + |
| Guanine                     | Nucleotide     | 152.0 | 110.0 | 20.0  | 28.0 | HMDB0000132 | LCMS | + |
| HexanoylCarnitine           | Carnitine      | 260.2 | 85.1  | 80.0  | 25.0 | HMDB0000705 | LCMS | + |
| Histamine                   | Amino acid     | 112.0 | 95.0  | 65.0  | 18.0 | HMDB0000870 | LCMS | + |

*Metabolic signature of dysfunctional mitochondria*

|                         |             |       |      |       |       |             |      |   |
|-------------------------|-------------|-------|------|-------|-------|-------------|------|---|
| IsobutyrylCarnitine     | Carnitine   | 232.1 | 85.1 | 70.0  | 30.0  | HMDB0000736 | LCMS | + |
| L-PalmitoylCarnitine    | Carnitine   | 400.4 | 85.1 | 30.0  | 40.0  | HMDB0000222 | LCMS | + |
| PropionylCarnitine      | Carnitine   | 218.1 | 85.1 | 60.0  | 24.0  | HMDB0000824 | LCMS | + |
| Argininosuccinate       | Amino acid  | 291.1 | 69.9 | 40.0  | 32.0  | HMDB0000052 | LCMS | + |
| Cystathionine           | Amino acid  | 221.1 | 79.1 | -87.0 | -30.0 | HMDB0000099 | LCMS | - |
| Erythritol              | Sugar       | 123.0 | 80.0 | 40.0  | 33.0  | HMDB0002994 | LCMS | + |
| MyristoylCarnitine      | Carnitine   | 372.4 | 85.1 | 70.0  | 25.0  | HMDB0005066 | LCMS | + |
| N-alpha-Acetyl-L-lysine | Amino acid  | 189.1 | 84.1 | 50.0  | 32.0  | HMDB0000446 | LCMS | + |
| 2-hydroxyglutarate      | Glucose     | 433.2 | NA   | NA    | NA    | HMDB0059655 | GCMS | + |
| 3-Hydroxybutyric acid   | Ketone body | 275.1 | NA   | NA    | NA    | HMDB0000357 | GCMS | + |
| 3-Phosphoglyceric acid  | Glucose     | 585.3 | NA   | NA    | NA    | HMDB0000807 | GCMS | + |
| 4-hydroxyproline        | Amino acid  | 314.2 | NA   | NA    | NA    | HMDB00725   | GCMS | + |
| Acetoacetate            | Ketone body | 188.1 | NA   | NA    | NA    | HMDB0000060 | GCMS | + |
| alpha-Ketoglutarate     | Glucose     | 346.0 | NA   | NA    | NA    | HMDB0000208 | GCMS | + |
| Asparagine              | Amino acid  | 417.0 | NA   | NA    | NA    | HMDB0000168 | GCMS | + |
| Aspartate               | Amino acid  | 418.0 | NA   | NA    | NA    | HMDB0000191 | GCMS | + |
| Cholesterol             | Lipid       | 443.4 | NA   | NA    | NA    | HMDB0000067 | GCMS | + |
| Citrate                 | Glucose     | 459.0 | NA   | NA    | NA    | HMDB0000094 | GCMS | + |
| Cysteine                | Amino acid  | 304.2 | NA   | NA    | NA    | HMDB0000574 | GCMS | + |
| Cystine                 | Amino acid  | 302.2 | NA   | NA    | NA    | HMDB0000192 | GCMS | + |
| Fumarate                | Glucose     | 287.0 | NA   | NA    | NA    | HMDB0000134 | GCMS | + |
| Glutamate               | Amino acid  | 432.0 | NA   | NA    | NA    | HMDB0003339 | GCMS | + |
| Glycerate               | Lipid       | 391.2 | NA   | NA    | NA    | HMDB0000139 | GCMS | + |
| Glycine                 | Amino acid  | 218.0 | NA   | NA    | NA    | HMDB0000123 | GCMS | + |
| Histidine               | Amino acid  | 196.1 | NA   | NA    | NA    | HMDB0000177 | GCMS | + |
| Isocitrate              | Glucose     | 591.3 | NA   | NA    | NA    | HMDB0000193 | GCMS | + |
| Isoleucine              | Amino acid  | 200.0 | NA   | NA    | NA    | HMDB0000172 | GCMS | + |
| Lactate                 | Glucose     | 261.0 | NA   | NA    | NA    | HMDB0000190 | GCMS | + |
| Leucine                 | Amino acid  | 200.0 | NA   | NA    | NA    | HMDB0000687 | GCMS | + |
| Malate                  | Glucose     | 419.2 | NA   | NA    | NA    | HMDB0031518 | GCMS | + |
| Methionine              | Amino acid  | 218.0 | NA   | NA    | NA    | HMDB0000696 | GCMS | + |
| Palmitate               | Lipid       | 313.2 | NA   | NA    | NA    | HMDB0000220 | GCMS | + |
| Phosphoenolpyruvic acid | Glucose     | 453.1 | NA   | NA    | NA    | HMDB0000263 | GCMS | + |
| Phenylalanine           | Amino acid  | 302.0 | NA   | NA    | NA    | HMDB0000159 | GCMS | + |
| Pyruvate                | Glucose     | 174.0 | NA   | NA    | NA    | HMDB0000243 | GCMS | + |
| Stearic acid            | Lipid       | 341.3 | NA   | NA    | NA    | HMDB0000827 | GCMS | + |
| Succinate               | Glucose     | 289.0 | NA   | NA    | NA    | HMDB0000254 | GCMS | + |
| Succinic semialdehyde   | Amino acid  | 159.1 | NA   | NA    | NA    | HMDB0001259 | GCMS | + |
| Taurine                 | Amino acid  | 296.0 | NA   | NA    | NA    | HMDB0000251 | GCMS | + |
| Uracil                  | Nucleotide  | 283.3 | NA   | NA    | NA    | HMDB00300   | GCMS | + |
| Urea                    | Nucleotide  | 231.1 | NA   | NA    | NA    | HMDB0000294 | GCMS | + |

*Metabolic signature of dysfunctional mitochondria*

|                            |            |       |    |    |    |             |      |   |
|----------------------------|------------|-------|----|----|----|-------------|------|---|
| Beta-Alanine               | Amino acid | 260.2 | NA | NA | NA | HMDB0000056 | GCMS | + |
| Biotin                     | Vitamin    | 529.4 | NA | NA | NA | HMDB0000030 | GCMS | + |
| Carbonate                  | Glucose    | 233.1 | NA | NA | NA | HMDB0031453 | GCMS | + |
| Cis-aconitic acid          | Glucose    | 459.2 | NA | NA | NA | HMDB0000072 | GCMS | + |
| Glyceraldehyde 3-phosphate | Glucose    | 484.2 | NA | NA | NA | HMDB0001112 | GCMS | + |
| Glycerol                   | Lipid      | 377.2 | NA | NA | NA | HMDB0000131 | GCMS | + |
| Maleic Acid                | Glucose    | 287.1 | NA | NA | NA | HMDB0000176 | GCMS | + |
| N-Acetylglycine            | Amino acid | 288.1 | NA | NA | NA | HMDB0000532 | GCMS | + |
| N-Acetyl-L-aspartic acid   | Amino acid | 460.2 | NA | NA | NA | HMDB0000812 | GCMS | + |
